# Supplementary figures and images for: Loneliness, Wellbeing, and Social Activity in Scottish Older Adults Resulting from Social Distancing during the COVID-19 Pandemic
Source: MDPI journal article supplement (doi:10.3390/ijerph18094517), 2021-04-24

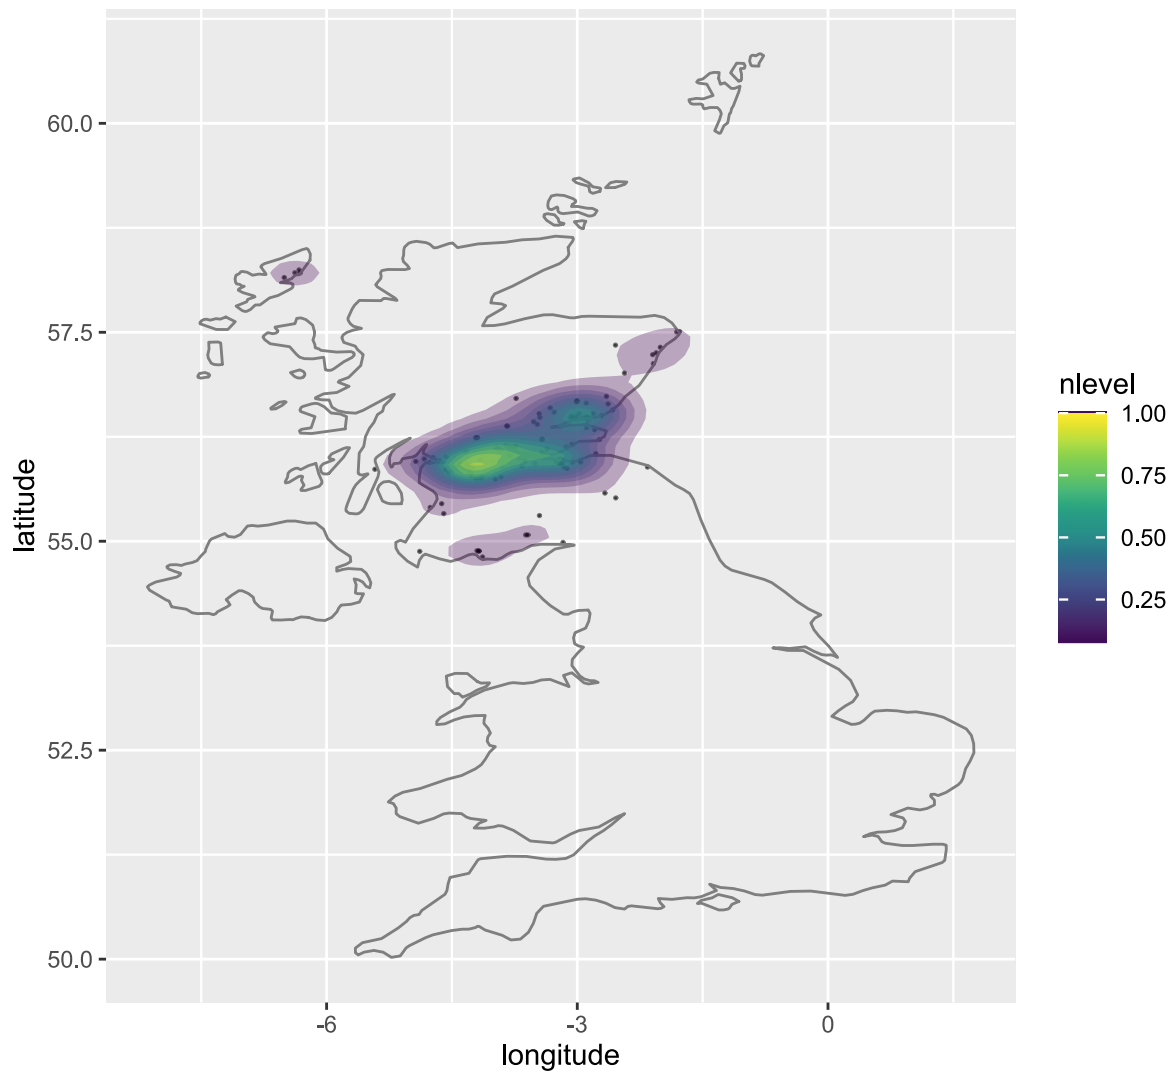

**Figure S1.** Two-dimensional density of respondents' locations across Scotland.

Supplement: s1 [file s1]
